# Supplementary material for: Biodegradable ZnxNi1−xS hollow nanospheres for NIR-driven photothermal antibacterial therapy
Source: Royal Society of Chemistry journal article supplement (doi:10.1039/d2qm00716a), 2022-01-01
Supplement: d2qm00716a1.pdf [file d2qm00716a1.pdf]

## **Biodegradable $Zn_xNi_{1-x}S$ hollow nanospheres for NIR-driven photothermal antibacterial therapy**

*Qianqian Jin<sup>a,b</sup>, Shi Chen<sup>c</sup>, Zhaoyou Chu<sup>d</sup>, Benjin Chen<sup>d</sup>, Wannu Wang<sup>a,\*</sup>, Juan Yang<sup>d</sup>,*

*Yongxin Jiang<sup>d</sup>, Min Shao<sup>c,\*</sup>, Haisheng Qian<sup>a,\*</sup>*

*<sup>a</sup> School of Biomedical Engineering, Research and Engineering Center of Biomedical Materials, Anhui Provincial Institute of Translational Medicine, Anhui Medical University, Hefei, Anhui, 230032, P. R. China.*

*<sup>b</sup> School of Food and Biological Engineering, Hefei University of Technology, Hefei 230009, P. R. China.*

*<sup>c</sup> Department of Critical Care Medicine, The First Affiliated Hospital of Anhui Medical University, Hefei 230032, P. R. China*

*<sup>d</sup> School of Basic Medical Sciences Anhui Medical University, Hefei 230032, P. R. China.*

## Materials

All chemicals were of analytical grade and used without further purification.

Hexadecyl trimethylammonium bromide (CTAB, C<sub>19</sub>H<sub>42</sub>BrN, 99%) and Poly (maleic anhydride-alt-1-octadecene) (PMHC<sub>18</sub>, 99.0%) were obtained from Shanghai Macklin Biochemical Co., Ltd. L(+)-Ascorbic acid (AA, C<sub>6</sub>H<sub>8</sub>O<sub>6</sub>, 99.7%), ethylene glycol (C<sub>2</sub>H<sub>6</sub>O<sub>2</sub>, 99%), hexamethylenetetramine (HMTA, C<sub>6</sub>H<sub>12</sub>N<sub>4</sub>, 99%) and zinc nitrate hexahydrate (Zn(NO<sub>3</sub>)<sub>2</sub>·6H<sub>2</sub>O, 99%) were gained from Sinopharm Chemical Reagent Co., Ltd. Nickel acetate tetrahydrate (C<sub>4</sub>H<sub>6</sub>NiO<sub>4</sub>·4H<sub>2</sub>O, 99%), thiourea (H<sub>2</sub>NCSNH<sub>2</sub>, 99%) and mPEG-NH<sub>2</sub> (95.0%) were obtained from Aladdin Industrial Corporation. BacLight™ Kit L-7012 was purchased from Thermo Fisher Scientific Inc. Glutaraldehyde (C<sub>5</sub>H<sub>8</sub>O<sub>2</sub>, 2.5 wt%) was purchased from Beijing Leagene Biotechnology Co., Ltd. Both LB broth medium and LB agar slants were bought from Hangzhou Microbial Reagent Co., Ltd. Gram-negative bacteria, DH5α (*E. coli*), and Gram-positive bacteria, ATCC43300 (*MRSA*) were grown in Luria-Bertani (LB) broth medium at 37°C. Human umbilical vein endothelial cells (HUVEC), normal human hepatocytes (L02) and mouse mammary epithelial cells (HC11) were obtained from the American Type Culture Collection (ATCC). Deionized water was supplied through a Milli-Q water system. 3-(4, 5-dimethyl-2-thiazolyl)-2,5-diphenyl tetrazolium bromide (MTT) were obtained from Gibco Life Technologies.

## Live/Dead Bacterial Staining Assay

The bacterial suspensions were labeled using a Live/Dead BacLight bacterial viability kit containing PI and SYTO 9. Typically, the bacterial samples treated with different conditions

were co-cultured with PI and SYTO 9 for 20 min in dark, and then the live and dead bacteria could be observed by the fluorescence microscopy.

### **Morphological Characterization of Bacteria**

The bacteria samples treated with different conditions were washed with PBS for several times and then fixed with 2.5% glutaraldehyde for 12 h, followed by dehydration of ethanol of gradient concentrations (30%, 50%, 70%, 90%, 100%). Finally, the samples after freeze-dry could be observed with SEM.

### **Minimum inhibition concentration (MIC) and minimum bactericidal concentration (MBC) Determination**

*E. coli* (DH5 $\alpha$ ) and methicillin-resistant *S. aureus* (ATCC43300) were used for antibacterial assay. 100  $\mu$ L of bacterial stored at -80°C was added to 100 mL sterile LB broth medium at 37°C within a shaking incubator under 150 rpm overnight. ZNSP with different concentrations (from 0 to 100  $\mu$ g mL<sup>-1</sup>) were respectively mixed with 200  $\mu$ L of diluted bacteria ( $1 \times 10^6$  CFU mL<sup>-1</sup>) in a 96-well plate. Each group contained three parallel experiments. After irradiated by NIR laser (808 nm, 2.0 W cm<sup>-2</sup>) for 3 min, the mixtures were incubated at 37°C for 12 h in the shaking incubator. The minimum inhibition concentration (MIC) of the antibacterial samples could be observed in the 96-well plate where the mixtures were clear with no visual turbidity of bacteria. Then the MBC was evaluated by plate count method. 100  $\mu$ L of the mixtures from MIC were symmetrical delivered onto the surface of LB agar plates and then incubated at 37°C for 24 h. The MBC could be obtained where the bacteria was killed completely.

## Supporting Figures

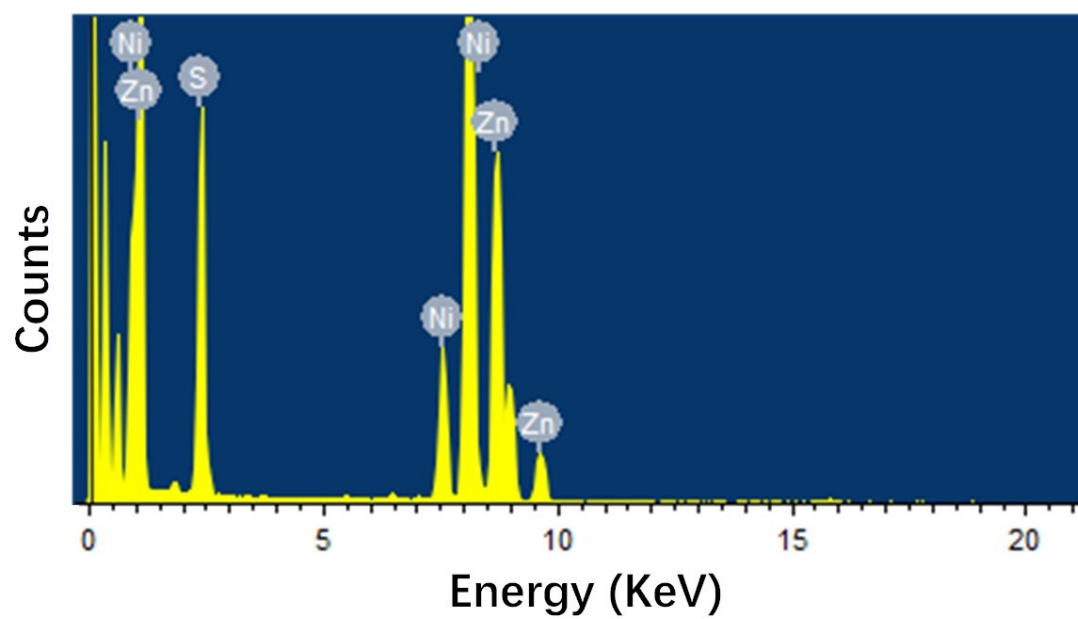

**Fig. S1.** Energy dispersive X-ray spectra of the as-obtained ZNSP nanostructures.

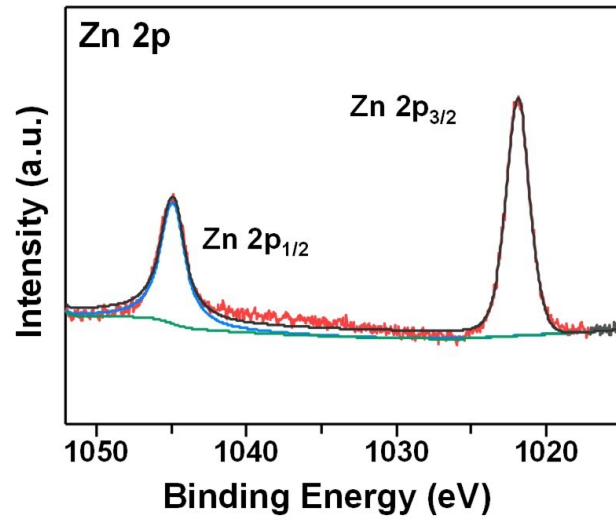

**Fig. S2.** Zn 2p of as-obtained ZNS.

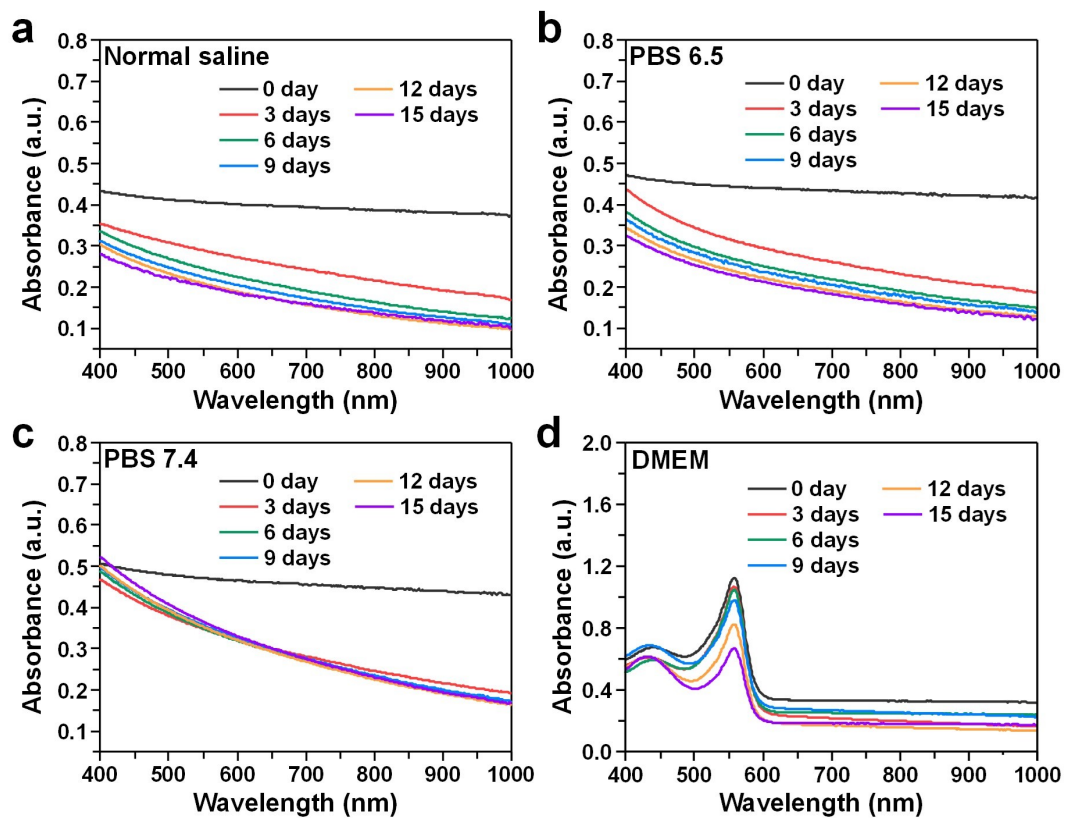

**Fig. S3.** UV-Vis-NIR absorption spectra of the ZNSP nanostructures in (a) normal saline, (b) PBS 6.5, (c) PBS 7.4, (d) DMEM over time related to Fig. 3b.

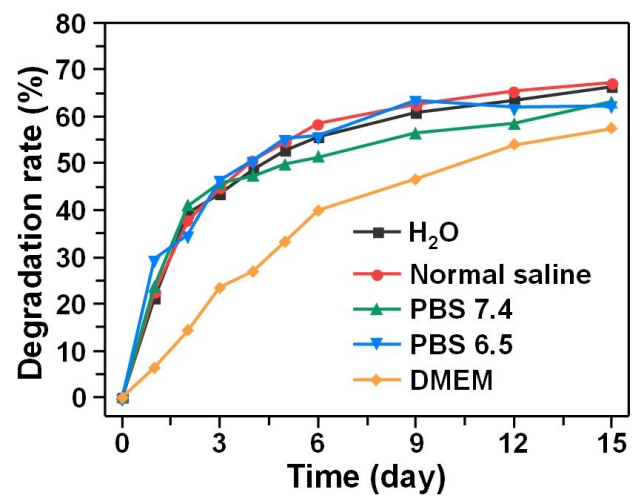

**Fig. S4.** Comparison of the degradation rate for ZNSP in various medium on the 15 days.

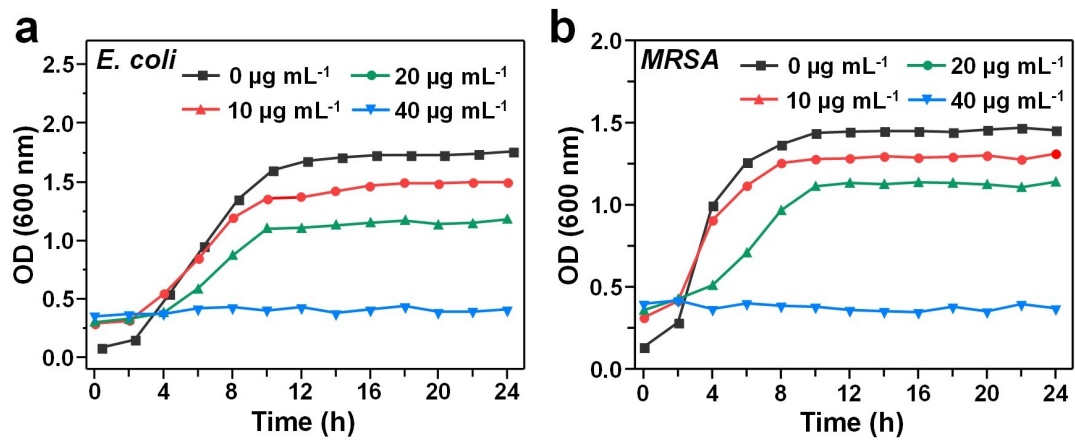

**Fig. S5.** Growth curves of (a) *E. coli* and (b) *MRSA* treated with ZNSP nanostructures at different concentration after NIR irradiation.



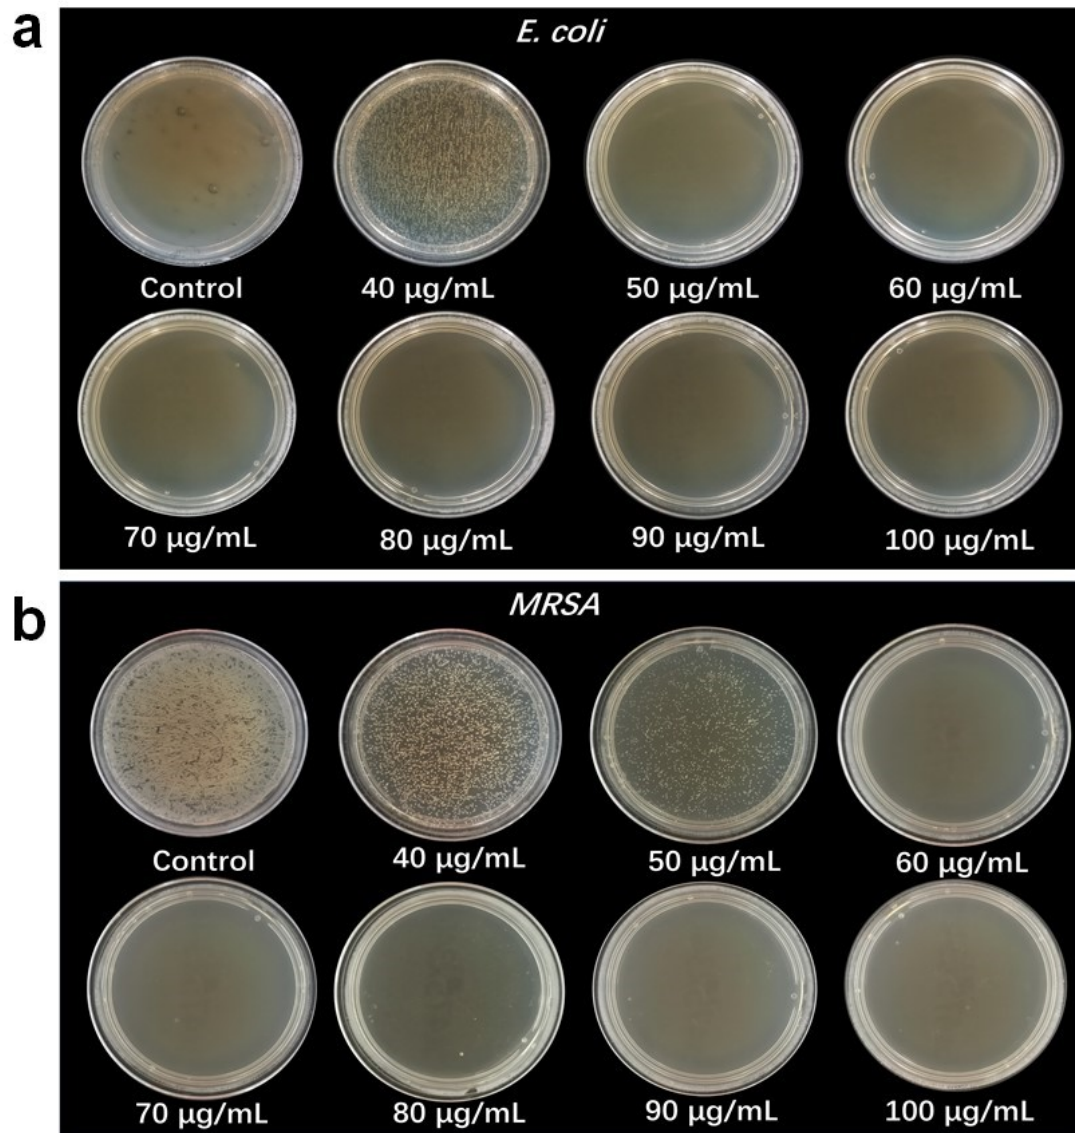

**Fig. S6.** Photographs of colonies of (a) *E. coli* and (b) *MRSA* treated with ZNSP nanostructures at different concentration after NIR irradiation.

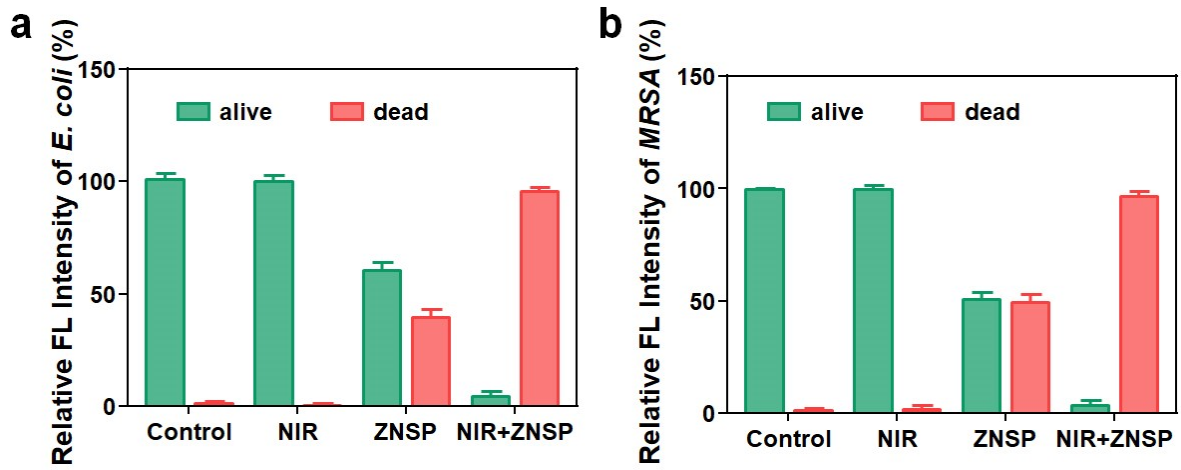

**Fig. S7.** The fluorescence intensity in Fig. 4e and 4f calculated by Image J.

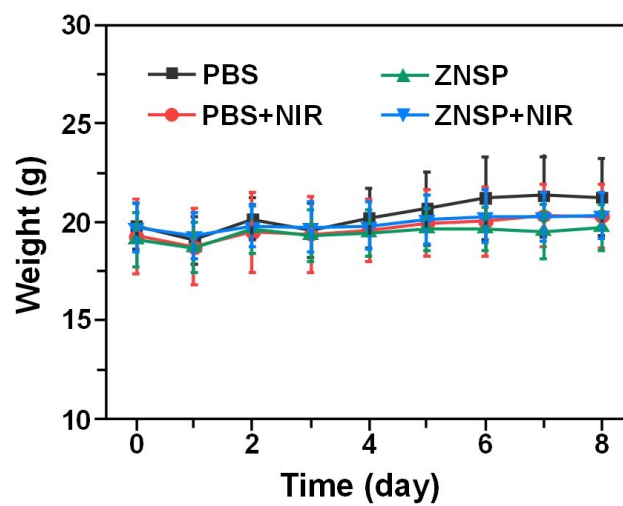

**Fig. S8.** The body weights change during various treatments. Related to Fig. 5.

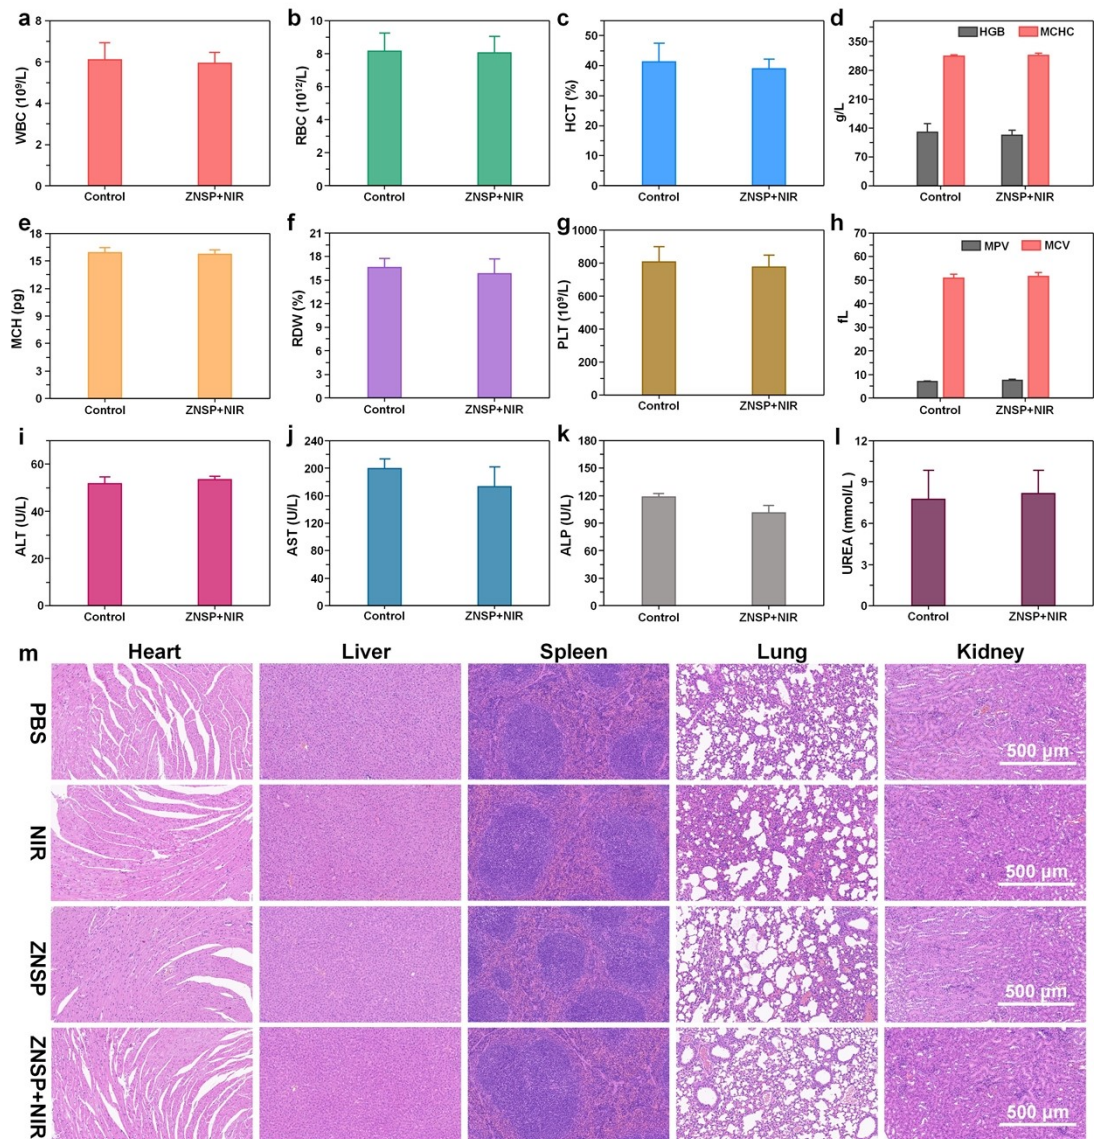

**Fig. S9.** The blood panel analysis (a) and the blood biochemistry test; (b) H&E staining images of major organs (including heart, liver, spleen, lung, and kidney) of the mice after treatment.

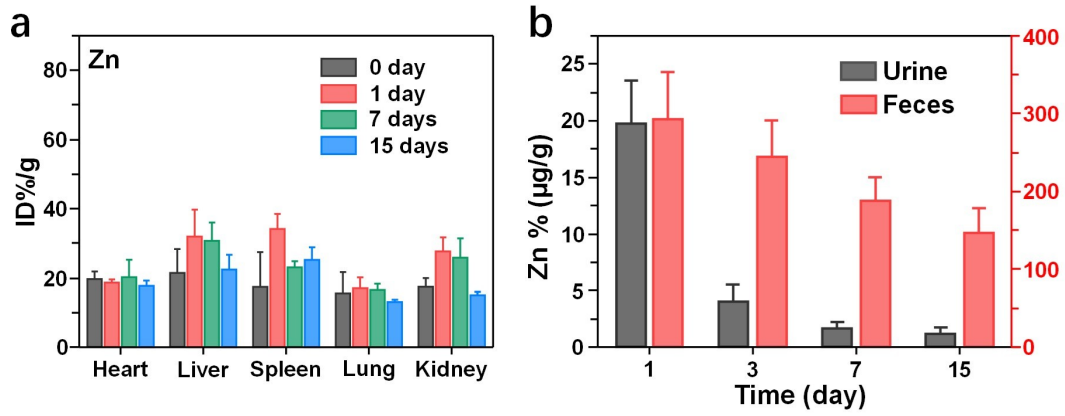

**Fig. S10.** (a) Biodistribution of Zn *in vivo* and (b) emission manner at different time.

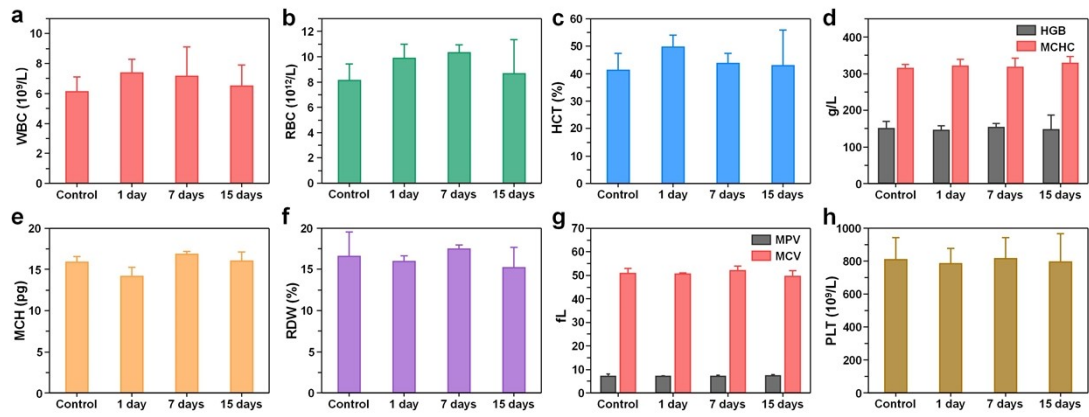

**Fig. S11.** The blood panel analysis after intravenous injection of ZNSP nanostructures at different days (dose: 5 mg kg<sup>-1</sup>).

**Table S1.** The concentration of released metal ions measured by ICP-MS.

| Parameters   | Ni (ppb) | Zn (ppb) |
|--------------|----------|----------|
| pH=7.4, 37°C | 4014.544 | 206.958  |
|              | 3639.848 | 281.382  |
|              | 5002.346 | 235.094  |
| pH=6.5, 37°C | 5213.441 | 366.344  |
|              | 6023.790 | 471.826  |
|              | 5789.237 | 562.674  |
| pH=7.4, 45°C | 5151.495 | 554.862  |
|              | 5551.331 | 704.430  |
|              | 6451.762 | 631.552  |
| pH=6.5, 45°C | 9336.835 | 1284.982 |
|              | 8579.301 | 1023.876 |
|              | 8906.643 | 1118.854 |

**Table S2.** MIC and MBC of ZNSP nanostructures against *E. coli* and *MRSA*

| Bacteria       | MIC ( $\mu\text{g mL}^{-1}$ ) | MBC ( $\mu\text{g mL}^{-1}$ ) |
|----------------|-------------------------------|-------------------------------|
| <i>E. coli</i> | 40                            | 50                            |
| <i>MRSA</i>    | 40                            | 60                            |
